# Supplementary material for: Determining a healthy reference range and factors potentially influencing PRO-C3 – A biomarker of liver fibrosis
Source: PubMed Central journal article supplement (PMC8385245; doi:10.1016/j.jhepr.2021.100317), 2021-07-10
Supplement: mmc2.pdf [file mmc2.pdf]

## Journal of Hepatology

### CTAT methods

Tables for a “Complete, Transparent, Accurate and Timely account” (CTAT) are now mandatory for all revised submissions. The aim is to enhance the reproducibility of methods.

- Only include the parts relevant to your study
- Refer to the CTAT in the main text as ‘Supplementary CTAT Table’
- Do not add subheadings
- Add as many rows as needed to include all information
- Only include one item per row

If the CTAT form is not relevant to your study, please outline the reasons why:

|  |
|--|
|  |
|--|

#### 1.1 Antibodies

| Name | Citation | Supplier | Cat no. | Clone no. |
|------|----------|----------|---------|-----------|
|      |          |          |         |           |

#### 1.2 Cell lines

| Name | Citation | Supplier | Cat no. | Passage no. | Authentication test method |
|------|----------|----------|---------|-------------|----------------------------|
|      |          |          |         |             |                            |

#### 1.3 Organisms

| Name | Citation | Supplier | Strain | Sex | Age | Overall n number |
|------|----------|----------|--------|-----|-----|------------------|
|      |          |          |        |     |     |                  |

#### 1.4 Sequence based reagents

| Name | Sequence | Supplier |
|------|----------|----------|
|      |          |          |

#### 1.5 Biological samples

| Description         | Source                                                                                                             | Identifier |
|---------------------|--------------------------------------------------------------------------------------------------------------------|------------|
| NAFLD patients (DE) | Department of Internal Medicine I, University Medical Centre of the Johannes Gutenberg-University, Mainz, Germany. | N/A        |
| NAFLD patients (DK) | Department of Clinical Medicine, Faculty of Health and Medical                                                     | N/A        |

|            |                                                                                                                                                                                                                                                          |     |
|------------|----------------------------------------------------------------------------------------------------------------------------------------------------------------------------------------------------------------------------------------------------------|-----|
|            | Sciences, University of Copenhagen, Copenhagen Denmark<br>Gastro Unit, Medical Division, Hvidovre. Hospital, University of Copenhagen, Hvidovre, Denmark.                                                                                                |     |
| NAFLD (UK) | Nottingham Digestive Diseases Centre, University of Nottingham, Nottingham, United Kingdom.<br>NIHR Nottingham Biomedical Research Centre at the Nottingham University Hospitals NHS Trust and the University of Nottingham, Nottingham, United Kingdom. | N/A |

## 1.6 Deposited data

| Name of repository | Identifier              | Link                              |
|--------------------|-------------------------|-----------------------------------|
| Healthy volunteers | Discovery Life Sciences | info@dls.com                      |
| NASH patients      | Reprocell               | https://www.reprocell.com/contact |

## 1.7 Software

| Software name | Manufacturer | Version |
|---------------|--------------|---------|
|               |              |         |

## 1.8 Other (e.g. drugs, proteins, vectors etc.)

| PRO-C3 ELISA analysis of                                | Nordic Bioscience | Lot. No.                      |
|---------------------------------------------------------|-------------------|-------------------------------|
| Technical testing (CLSI)                                | Cat.no. 1700-03   | EB1806A<br>EB1807A<br>EB1808A |
| Healthy volunteers                                      | Cat.no. 1700-03   | EB1807A                       |
| Reprocell                                               | Cat.no. 1700-03   | EB1807A                       |
| NAFLD/NASH : UK, DK, DE<br>(for full adresse see above) | Cat.no. 1700-03   | EB1911A<br>EB1808A            |

## 1.9 Please provide the details of the corresponding methods author for the manuscript:

**Daniel Guldager Kring Rasmussen**, MSc, PhD  
**E-mail:** [dgr@nordicbio.com](mailto:dgr@nordicbio.com)  
**Tel.No.:** +45444525252

Nordic Bioscience  
Herlev Hovedgade 205-207, DK-2730, Denmark

**2.0 Please confirm for randomised controlled trials all versions of the clinical protocol are included in the submission. These will be published online as supplementary information.**
